# Supplementary material
Source: publisher figshare collection journal article supplement (https://acs.figshare.com/ndownloader/files/4162435)
Supplement: Supplementary file 1 [file 4162435]

 
data_Compount_7
 
_audit_creation_method            SHELXL-97 
_chemical_name_systematic 
; 
 ? 
; 
_chemical_name_common             ? 
_chemical_melting_point           ? 
_chemical_formula_moiety            
 'C13 H15 Fe N O Se' 
_chemical_formula_sum 
 'C13 H15 Fe N O Se' 
_chemical_formula_weight          336.07 
 
loop_ 
 _atom_type_symbol 
 _atom_type_description 
 _atom_type_scat_dispersion_real 
 _atom_type_scat_dispersion_imag 
 _atom_type_scat_source 
 'C'  'C'   0.0033   0.0016 
 'International Tables Vol C Tables 4.2.6.8 and 6.1.1.4' 
 'H'  'H'   0.0000   0.0000 
 'International Tables Vol C Tables 4.2.6.8 and 6.1.1.4' 
 'N'  'N'   0.0061   0.0033 
 'International Tables Vol C Tables 4.2.6.8 and 6.1.1.4' 
 'O'  'O'   0.0106   0.0060 
 'International Tables Vol C Tables 4.2.6.8 and 6.1.1.4' 
 'Fe'  'Fe'   0.3463   0.8444 
 'International Tables Vol C Tables 4.2.6.8 and 6.1.1.4' 
 'Se'  'Se'  -0.0929   2.2259 
 'International Tables Vol C Tables 4.2.6.8 and 6.1.1.4' 
 
_symmetry_cell_setting           'Monoclinic'
_symmetry_space_group_name_H-M   'C 2/c'
_symmetry_space_group_name_Hall  '-C 2yc' 
 
loop_ 
 _symmetry_equiv_pos_as_xyz 
 'x, y, z' 
 '-x, y, -z+1/2' 
 'x+1/2, y+1/2, z' 
 '-x+1/2, y+1/2, -z+1/2' 
 '-x, -y, -z' 
 'x, -y, z-1/2' 
 '-x+1/2, -y+1/2, -z' 
 'x+1/2, -y+1/2, z-1/2' 
 
_cell_length_a                    17.9830(19) 
_cell_length_b                    7.4102(8) 
_cell_length_c                    19.235(2) 
_cell_angle_alpha                 90.00 
_cell_angle_beta                  93.649(2) 
_cell_angle_gamma                 90.00 
_cell_volume                      2558.0(5) 
_cell_formula_units_Z             8 
_cell_measurement_temperature     298(2)
_cell_measurement_reflns_used     5212
_cell_measurement_theta_min        2.27
_cell_measurement_theta_max       25.28
 
_exptl_crystal_description        'prism'
_exptl_crystal_colour             'red'
_exptl_crystal_size_min           0.094
_exptl_crystal_size_mid           0.184
_exptl_crystal_size_max           0.284 
_exptl_crystal_density_meas       ? 
_exptl_crystal_density_diffrn     1.745 
_exptl_crystal_density_method     'not measured' 
_exptl_crystal_F_000              1344 
_exptl_absorpt_coefficient_mu     4.007 
_exptl_absorpt_correction_type    'multi-scan'
_exptl_absorpt_correction_T_min   0.4250
_exptl_absorpt_correction_T_max   0.7048
_exptl_absorpt_process_details    '(Sheldrick, 2008)'
 
_exptl_special_details 
; 
 ? 
; 
 
_diffrn_ambient_temperature       298(2) 
_diffrn_radiation_wavelength      0.71073 
_diffrn_radiation_type            MoK\a 
_diffrn_radiation_source          'fine-focus sealed tube' 
_diffrn_radiation_monochromator   graphite 
_diffrn_measurement_device_type   'Bruker Smart Apex CCD diffractometer 01-670' 
_diffrn_measurement_method        '\w-scans'
_diffrn_detector_area_resol_mean  0.661 
_diffrn_standards_number          ? 
_diffrn_standards_interval_count  ? 
_diffrn_standards_interval_time   ? 
_diffrn_standards_decay_%         0  
_diffrn_reflns_number             10155 
_diffrn_reflns_av_R_equivalents   0.0268 
_diffrn_reflns_av_sigmaI/netI     0.0253 
_diffrn_reflns_limit_h_min        -21 
_diffrn_reflns_limit_h_max        21 
_diffrn_reflns_limit_k_min        -8 
_diffrn_reflns_limit_k_max        8 
_diffrn_reflns_limit_l_min        -23 
_diffrn_reflns_limit_l_max        22 
_diffrn_reflns_theta_min          2.27 
_diffrn_reflns_theta_max          25.37 
_reflns_number_total              2337 
_reflns_number_gt                 2025 
_reflns_threshold_expression      >2sigma(I) 
 
_computing_data_collection        'SMART V 5.625 (Bruker, 1999)'
_computing_cell_refinement        'SMART V 5.625 (Bruker, 1999)'
_computing_data_reduction         'SAINT V 7.34A (Bruker, 2006)'
_computing_structure_solution     'SHELXTL V 6.12 (Sheldrick, 2000)'
_computing_structure_refinement   'SHELXTL V 6.12 (Sheldrick, 2000)'
_computing_molecular_graphics     'SHELXTL V 6.12 (Sheldrick, 2000)'
_computing_publication_material   'SHELXTL V 6.12 (Sheldrick, 2000)' 
 
_refine_special_details 
; 
 Refinement of F^2^ against ALL reflections.  The weighted R-factor wR and 
 goodness of fit S are based on F^2^, conventional R-factors R are based 
 on F, with F set to zero for negative F^2^. The threshold expression of 
 F^2^ > 2sigma(F^2^) is used only for calculating R-factors(gt) etc. and is 
 not relevant to the choice of reflections for refinement.  R-factors based 
 on F^2^ are statistically about twice as large as those based on F, and R- 
 factors based on ALL data will be even larger. 
; 
 
_refine_ls_structure_factor_coef  Fsqd  
_refine_ls_matrix_type            full 
_refine_ls_weighting_scheme       calc  
_refine_ls_weighting_details 
 'calc w=1/[\s^2^(Fo^2^)+(0.0364P)^2^+0.0153P] where P=(Fo^2^+2Fc^2^)/3' 
_atom_sites_solution_primary      direct 
_atom_sites_solution_secondary    difmap 
_atom_sites_solution_hydrogens    geom 
_refine_ls_hydrogen_treatment     mixed 
_refine_ls_extinction_method      none 
_refine_ls_extinction_coef        ? 
_refine_ls_number_reflns          2337 
_refine_ls_number_parameters      206 
_refine_ls_number_restraints      172 
_refine_ls_R_factor_all           0.0315 
_refine_ls_R_factor_gt            0.0254 
_refine_ls_wR_factor_ref          0.0629 
_refine_ls_wR_factor_gt           0.0603 
_refine_ls_goodness_of_fit_ref    1.059 
_refine_ls_restrained_S_all       1.034 
_refine_ls_shift/su_max           0.001 
_refine_ls_shift/su_mean          0.000 
 
loop_ 
 _atom_site_label 
 _atom_site_type_symbol 
 _atom_site_fract_x 
 _atom_site_fract_y 
 _atom_site_fract_z 
 _atom_site_U_iso_or_equiv 
 _atom_site_adp_type 
 _atom_site_occupancy 
 _atom_site_symmetry_multiplicity 
 _atom_site_calc_flag 
 _atom_site_refinement_flags 
 _atom_site_disorder_assembly 
 _atom_site_disorder_group 
Fe1 Fe 0.681029(16) 0.33715(4) 0.127171(16) 0.03334(11) Uani 1 1 d . . . 
Se1 Se 0.463948(14) 0.50703(3) 0.157785(14) 0.05083(11) Uani 1 1 d . A . 
O1 O 0.47351(12) -0.0982(2) 0.07947(10) 0.0599(5) Uani 1 1 d . . . 
H1A H 0.479(2) -0.184(4) 0.1016(18) 0.090 Uiso 1 1 d . . . 
N1 N 0.48919(10) 0.2736(3) 0.04887(11) 0.0402(5) Uani 1 1 d . A . 
H1 H 0.5126(14) 0.227(4) 0.0226(13) 0.048 Uiso 1 1 d . . . 
C1 C 0.59272(12) 0.4632(3) 0.07819(12) 0.0345(5) Uani 1 1 d . A . 
C2 C 0.63561(13) 0.5875(3) 0.12092(13) 0.0427(6) Uani 1 1 d . A . 
H2 H 0.6176 0.6567 0.1599 0.051 Uiso 1 1 calc R . . 
C3 C 0.70802(13) 0.5934(3) 0.09776(15) 0.0481(6) Uani 1 1 d . A . 
H3 H 0.7493 0.6660 0.1183 0.058 Uiso 1 1 calc R . . 
C4 C 0.71176(13) 0.4742(3) 0.04090(13) 0.0462(6) Uani 1 1 d . A . 
H4A H 0.7561 0.4498 0.0153 0.055 Uiso 1 1 calc R . . 
C5 C 0.64105(12) 0.3925(3) 0.02806(12) 0.0386(5) Uani 1 1 d . A . 
H5 H 0.6275 0.3038 -0.0084 0.046 Uiso 1 1 calc R . . 
C6 C 0.6397(4) 0.1312(13) 0.1819(6) 0.0476(16) Uani 0.587(18) 1 d PDU A 1 
H6 H 0.5873 0.0950 0.1815 0.057 Uiso 0.587(18) 1 calc PR A 1 
C7 C 0.6757(5) 0.2554(15) 0.2277(5) 0.0492(15) Uani 0.587(18) 1 d PDU A 1 
H7A H 0.6525 0.3222 0.2646 0.059 Uiso 0.587(18) 1 calc PR A 1 
C8 C 0.7512(5) 0.2713(13) 0.2102(5) 0.0463(15) Uani 0.587(18) 1 d PDU A 1 
H8 H 0.7895 0.3491 0.2331 0.056 Uiso 0.587(18) 1 calc PR A 1 
C9 C 0.7609(4) 0.1508(14) 0.1542(5) 0.0443(15) Uani 0.587(18) 1 d PDU A 1 
H9 H 0.8072 0.1315 0.1309 0.053 Uiso 0.587(18) 1 calc PR A 1 
C10 C 0.6924(6) 0.0660(11) 0.1374(4) 0.0441(15) Uani 0.587(18) 1 d PDU A 1 
H10 H 0.6827 -0.0228 0.1002 0.053 Uiso 0.587(18) 1 calc PR A 1 
C6B C 0.7615(6) 0.235(2) 0.1984(8) 0.0478(19) Uani 0.413(18) 1 d PDU A 2 
H6B H 0.8108 0.2869 0.2098 0.057 Uiso 0.413(18) 1 calc PR A 2 
C7B C 0.7439(8) 0.1093(18) 0.1456(6) 0.0459(19) Uani 0.413(18) 1 d PDU A 2 
H7B H 0.7789 0.0574 0.1141 0.055 Uiso 0.413(18) 1 calc PR A 2 
C8B C 0.6669(8) 0.0669(16) 0.1464(7) 0.045(2) Uani 0.413(18) 1 d PDU A 2 
H8B H 0.6392 -0.0198 0.1161 0.054 Uiso 0.413(18) 1 calc PR A 2 
C9B C 0.6381(5) 0.170(2) 0.2008(7) 0.0455(19) Uani 0.413(18) 1 d PDU A 2 
H9B H 0.5864 0.1697 0.2141 0.055 Uiso 0.413(18) 1 calc PR A 2 
C10B C 0.6959(8) 0.276(2) 0.2311(7) 0.0457(19) Uani 0.413(18) 1 d PDU A 2 
H10B H 0.6917 0.3611 0.2697 0.055 Uiso 0.413(18) 1 calc PR A 2 
C11 C 0.51667(12) 0.4044(3) 0.08917(11) 0.0352(5) Uani 1 1 d . . . 
C12 C 0.41725(13) 0.1861(3) 0.05473(14) 0.0505(6) Uani 1 1 d . . . 
H12A H 0.3988 0.1426 0.0093 0.061 Uiso 1 1 calc R A . 
H12B H 0.3818 0.2733 0.0705 0.061 Uiso 1 1 calc R . . 
C13 C 0.42335(14) 0.0296(3) 0.10533(15) 0.0506(6) Uani 1 1 d . A . 
H13A H 0.4417 0.0715 0.1510 0.061 Uiso 1 1 calc R . . 
H13B H 0.3748 -0.0252 0.1094 0.061 Uiso 1 1 calc R . . 
 
loop_ 
 _atom_site_aniso_label 
 _atom_site_aniso_U_11 
 _atom_site_aniso_U_22 
 _atom_site_aniso_U_33 
 _atom_site_aniso_U_23 
 _atom_site_aniso_U_13 
 _atom_site_aniso_U_12 
Fe1 0.03374(17) 0.03016(18) 0.03559(19) 0.00016(13) -0.00184(12) 0.00363(13) 
Se1 0.05260(17) 0.04978(18) 0.05196(19) 0.00446(12) 0.01788(12) 0.00698(11) 
O1 0.0806(13) 0.0407(10) 0.0596(13) 0.0041(9) 0.0124(10) 0.0039(10) 
N1 0.0371(10) 0.0373(11) 0.0460(12) 0.0013(9) 0.0020(9) -0.0002(8) 
C1 0.0366(11) 0.0282(11) 0.0379(12) 0.0067(9) -0.0027(9) 0.0048(9) 
C2 0.0475(14) 0.0275(11) 0.0524(15) 0.0017(11) -0.0036(11) 0.0056(10) 
C3 0.0402(13) 0.0328(12) 0.0702(18) 0.0059(13) -0.0049(12) -0.0058(10) 
C4 0.0407(13) 0.0476(14) 0.0506(15) 0.0129(12) 0.0064(11) -0.0004(11) 
C5 0.0388(12) 0.0404(12) 0.0364(13) 0.0081(10) 0.0007(9) 0.0010(10) 
C6 0.048(2) 0.044(4) 0.050(4) 0.018(3) 0.001(2) 0.002(2) 
C7 0.050(3) 0.058(3) 0.040(3) 0.008(2) 0.002(3) 0.011(3) 
C8 0.047(3) 0.050(3) 0.040(3) -0.001(2) -0.013(2) 0.011(2) 
C9 0.037(2) 0.044(4) 0.051(3) 0.001(2) -0.009(2) 0.009(2) 
C10 0.048(4) 0.033(2) 0.051(3) 0.0069(19) -0.005(3) 0.006(3) 
C6B 0.042(3) 0.054(4) 0.046(4) 0.005(3) -0.009(3) 0.008(3) 
C7B 0.048(4) 0.038(4) 0.051(4) 0.004(3) -0.005(3) 0.018(3) 
C8B 0.051(4) 0.032(3) 0.049(4) 0.005(3) -0.006(4) 0.003(4) 
C9B 0.049(3) 0.047(4) 0.040(4) 0.010(3) 0.003(3) 0.002(3) 
C10B 0.053(4) 0.053(4) 0.030(3) 0.003(2) -0.008(3) 0.002(3) 
C11 0.0369(11) 0.0315(11) 0.0366(12) 0.0086(10) -0.0023(9) 0.0071(9) 
C12 0.0371(12) 0.0472(14) 0.0660(17) 0.0071(13) -0.0058(11) -0.0053(11) 
C13 0.0436(14) 0.0469(14) 0.0619(17) 0.0071(13) 0.0073(12) -0.0068(11) 
 
_geom_special_details 
; 
 All esds (except the esd in the dihedral angle between two l.s. planes) 
 are estimated using the full covariance matrix.  The cell esds are taken 
 into account individually in the estimation of esds in distances, angles 
 and torsion angles; correlations between esds in cell parameters are only 
 used when they are defined by crystal symmetry.  An approximate (isotropic) 
 treatment of cell esds is used for estimating esds involving l.s. planes. 
; 
 
loop_ 
 _geom_bond_atom_site_label_1 
 _geom_bond_atom_site_label_2 
 _geom_bond_distance 
 _geom_bond_site_symmetry_2 
 _geom_bond_publ_flag 
Fe1 C6 2.022(8) . ? 
Fe1 C1 2.023(2) . ? 
Fe1 C2 2.028(2) . ? 
Fe1 C10 2.028(8) . ? 
Fe1 C8 2.031(9) . ? 
Fe1 C7 2.034(11) . ? 
Fe1 C9 2.036(8) . ? 
Fe1 C5 2.036(2) . ? 
Fe1 C3 2.049(2) . ? 
Fe1 C7B 2.050(11) . ? 
Fe1 C10B 2.051(15) . ? 
Fe1 C4 2.051(2) . ? 
Se1 C11 1.838(2) . ? 
O1 C13 1.420(3) . ? 
N1 C11 1.318(3) . ? 
N1 C12 1.458(3) . ? 
C1 C2 1.428(3) . ? 
C1 C5 1.437(3) . ? 
C1 C11 1.463(3) . ? 
C2 C3 1.404(3) . ? 
C3 C4 1.411(4) . ? 
C4 C5 1.416(3) . ? 
C6 C10 1.402(7) . ? 
C6 C7 1.403(6) . ? 
C7 C8 1.425(6) . ? 
C8 C9 1.418(6) . ? 
C9 C10 1.403(6) . ? 
C6B C7B 1.397(8) . ? 
C6B C10B 1.407(9) . ? 
C7B C8B 1.421(7) . ? 
C8B C9B 1.421(7) . ? 
C9B C10B 1.398(7) . ? 
C12 C13 1.513(3) . ? 
 
loop_ 
 _geom_angle_atom_site_label_1 
 _geom_angle_atom_site_label_2 
 _geom_angle_atom_site_label_3 
 _geom_angle 
 _geom_angle_site_symmetry_1 
 _geom_angle_site_symmetry_3 
 _geom_angle_publ_flag 
C6 Fe1 C1 106.7(2) . . ? 
C6 Fe1 C2 124.2(3) . . ? 
C1 Fe1 C2 41.28(9) . . ? 
C6 Fe1 C10 40.5(2) . . ? 
C1 Fe1 C10 125.0(3) . . ? 
C2 Fe1 C10 161.8(3) . . ? 
C6 Fe1 C8 68.9(3) . . ? 
C1 Fe1 C8 155.2(3) . . ? 
C2 Fe1 C8 119.6(3) . . ? 
C10 Fe1 C8 68.4(3) . . ? 
C6 Fe1 C7 40.5(2) . . ? 
C1 Fe1 C7 119.8(3) . . ? 
C2 Fe1 C7 106.6(3) . . ? 
C10 Fe1 C7 67.9(3) . . ? 
C8 Fe1 C7 41.0(2) . . ? 
C6 Fe1 C9 68.4(3) . . ? 
C1 Fe1 C9 162.2(3) . . ? 
C2 Fe1 C9 155.6(3) . . ? 
C10 Fe1 C9 40.39(19) . . ? 
C8 Fe1 C9 40.8(2) . . ? 
C7 Fe1 C9 68.3(3) . . ? 
C6 Fe1 C5 121.3(3) . . ? 
C1 Fe1 C5 41.48(9) . . ? 
C2 Fe1 C5 69.10(9) . . ? 
C10 Fe1 C5 108.5(2) . . ? 
C8 Fe1 C5 161.7(3) . . ? 
C7 Fe1 C5 156.2(3) . . ? 
C9 Fe1 C5 125.3(3) . . ? 
C6 Fe1 C3 160.9(4) . . ? 
C1 Fe1 C3 68.67(9) . . ? 
C2 Fe1 C3 40.28(10) . . ? 
C10 Fe1 C3 157.1(3) . . ? 
C8 Fe1 C3 107.1(2) . . ? 
C7 Fe1 C3 124.4(3) . . ? 
C9 Fe1 C3 121.6(3) . . ? 
C5 Fe1 C3 68.31(10) . . ? 
C6 Fe1 C7B 60.3(4) . . ? 
C1 Fe1 C7B 150.3(5) . . ? 
C2 Fe1 C7B 168.4(5) . . ? 
C10 Fe1 C7B 27.9(3) . . ? 
C8 Fe1 C7B 50.1(4) . . ? 
C7 Fe1 C7B 69.5(4) . . ? 
C9 Fe1 C7B 12.9(4) . . ? 
C5 Fe1 C7B 119.1(4) . . ? 
C3 Fe1 C7B 132.3(4) . . ? 
C6 Fe1 C10B 49.9(4) . . ? 
C1 Fe1 C10B 127.3(4) . . ? 
C2 Fe1 C10B 106.6(4) . . ? 
C10 Fe1 C10B 71.4(4) . . ? 
C8 Fe1 C10B 31.2(4) . . ? 
C7 Fe1 C10B 11.1(4) . . ? 
C9 Fe1 C10B 63.6(4) . . ? 
C5 Fe1 C10B 166.8(4) . . ? 
C3 Fe1 C10B 117.1(4) . . ? 
C7B Fe1 C10B 67.3(4) . . ? 
C6 Fe1 C4 157.2(3) . . ? 
C1 Fe1 C4 68.81(9) . . ? 
C2 Fe1 C4 68.12(10) . . ? 
C10 Fe1 C4 122.6(3) . . ? 
C8 Fe1 C4 124.7(3) . . ? 
C7 Fe1 C4 161.4(3) . . ? 
C9 Fe1 C4 108.7(2) . . ? 
C5 Fe1 C4 40.53(9) . . ? 
C3 Fe1 C4 40.26(10) . . ? 
C7B Fe1 C4 112.0(3) . . ? 
C10B Fe1 C4 150.8(4) . . ? 
C11 N1 C12 125.7(2) . . ? 
C2 C1 C5 107.07(19) . . ? 
C2 C1 C11 125.8(2) . . ? 
C5 C1 C11 126.8(2) . . ? 
C2 C1 Fe1 69.54(12) . . ? 
C5 C1 Fe1 69.75(12) . . ? 
C11 C1 Fe1 120.58(14) . . ? 
C3 C2 C1 108.4(2) . . ? 
C3 C2 Fe1 70.67(13) . . ? 
C1 C2 Fe1 69.17(12) . . ? 
C2 C3 C4 108.5(2) . . ? 
C2 C3 Fe1 69.05(13) . . ? 
C4 C3 Fe1 69.95(13) . . ? 
C3 C4 C5 108.5(2) . . ? 
C3 C4 Fe1 69.79(14) . . ? 
C5 C4 Fe1 69.17(13) . . ? 
C4 C5 C1 107.6(2) . . ? 
C4 C5 Fe1 70.30(13) . . ? 
C1 C5 Fe1 68.76(12) . . ? 
C10 C6 C7 107.9(5) . . ? 
C10 C6 Fe1 70.0(4) . . ? 
C7 C6 Fe1 70.2(5) . . ? 
C6 C7 C8 108.3(5) . . ? 
C6 C7 Fe1 69.3(5) . . ? 
C8 C7 Fe1 69.4(5) . . ? 
C9 C8 C7 107.0(5) . . ? 
C9 C8 Fe1 69.8(4) . . ? 
C7 C8 Fe1 69.6(5) . . ? 
C10 C9 C8 108.0(4) . . ? 
C10 C9 Fe1 69.5(4) . . ? 
C8 C9 Fe1 69.4(4) . . ? 
C6 C10 C9 108.8(5) . . ? 
C6 C10 Fe1 69.5(4) . . ? 
C9 C10 Fe1 70.1(4) . . ? 
C7B C6B C10B 108.2(6) . . ? 
C7B C6B Fe1 69.3(7) . . ? 
C10B C6B Fe1 69.2(8) . . ? 
C6B C7B C8B 108.4(6) . . ? 
C6B C7B Fe1 71.1(7) . . ? 
C8B C7B Fe1 69.9(6) . . ? 
C9B C8B C7B 106.8(7) . . ? 
C9B C8B Fe1 70.2(7) . . ? 
C7B C8B Fe1 69.6(6) . . ? 
C10B C9B C8B 108.4(7) . . ? 
C10B C9B Fe1 69.6(8) . . ? 
C8B C9B Fe1 69.5(6) . . ? 
C9B C10B C6B 108.2(6) . . ? 
C9B C10B Fe1 70.7(7) . . ? 
C6B C10B Fe1 70.9(8) . . ? 
N1 C11 C1 116.9(2) . . ? 
N1 C11 Se1 122.38(17) . . ? 
C1 C11 Se1 120.66(16) . . ? 
N1 C12 C13 111.23(19) . . ? 
O1 C13 C12 107.9(2) . . ? 
 
loop_ 
 _geom_hbond_atom_site_label_D 
 _geom_hbond_atom_site_label_H 
 _geom_hbond_atom_site_label_A 
 _geom_hbond_distance_DH 
 _geom_hbond_distance_HA 
 _geom_hbond_distance_DA 
 _geom_hbond_angle_DHA 
 _geom_hbond_site_symmetry_A 
N1 H1 O1  0.76(2) 2.21(3) 2.906(3) 152(3) 5_655 
O1 H1A Se1  0.77(3) 2.55(3) 3.3000(19) 165(4) 1_545 
 
_diffrn_measured_fraction_theta_max    0.994 
_diffrn_reflns_theta_full              25.37 
_diffrn_measured_fraction_theta_full   0.994 
_refine_diff_density_max    0.367 
_refine_diff_density_min   -0.228 
_refine_diff_density_rms    0.062 
